# Supplementary material for: From model compounds to protein binding: syntheses, characterizations and fluorescence studies of [RuII(bipy)(terpy)L]2+complexes (bipy = 2,2′-bipyridine; terpy = 2,2′:6′,2″-terpyridine; L = imidazole, pyrazole and derivatives, cytochrome c)
Source: Royal Society of Chemistry journal article supplement (doi:10.1039/b414999h), 2004-12-09
Supplement: b414999h.pdf [file b414999h.pdf]

## Supplementary Material for

# From model compounds to protein binding: Syntheses, characterizations and fluorescence studies of $[\text{Ru}^{\text{II}}(\text{bipy})(\text{terpy})\text{L}]^{2+}$ complexes (bipy = 2,2'-bipyridine; terpy = 2,2':6',2''-terpyridine; L = imidazole, pyrazole and derivatives, cytochrome c)

Xiao-Juan Yang,<sup>a</sup> Friedrich Drepper,<sup>b</sup> Biao Wu,<sup>a</sup> Wen-Hua Sun,<sup>c</sup> Wolfgang Haehnel<sup>b</sup> and Christoph Janiak<sup>\*a</sup>

<sup>a</sup> Institut für Anorganische und Analytische Chemie, Universität Freiburg, Albertstr. 21, 79104 Freiburg, Germany. Fax: 49 761 2036147; Tel: 49 761 2036127; E-mail: [janiak@uni-freiburg.de](mailto:janiak@uni-freiburg.de)

<sup>b</sup> Institut für Biologie 2, Universität Freiburg, Schänzlestraße 1, 79104 Freiburg, Germany

<sup>c</sup> CAS Key Laboratory of Engineering Plastics, Institute of Chemistry, Chinese Academy of Sciences, Beijing 100080, People's Republic of China

**This submission was created using the RSC Article Template (DO NOT DELETE THIS TEXT)  
(LINE INCLUDED FOR SPACING ONLY - DO NOT DELETE THIS TEXT)**

This supplementary material contains a listing and more extensive discussion of the  $\pi$ - $\pi$  and C-H $\cdots\pi$  stacking found in the crystal structures of the complexes  $[(2,2'$ -Bipyridine)(imidazole)(2,2':6',2''-terpyridine)ruthenium(II)]bis(hexafluorophosphate),  $[\text{Ru}(\text{bipy})(\text{terpy})(\text{imi})](\text{PF}_6)_2$ , (**1**),  $[(2,2'$ -Bipyridine)(4,5-diphenylimidazole)(2,2':6',2''-terpyridine)ruthenium(II)]bis(hexafluorophosphate)-methanol,  $[\text{Ru}(\text{bipy})(\text{terpy})(\text{Ph}_2\text{imi})](\text{PF}_6)_2 \cdot \text{CH}_3\text{OH}$ , (**5**·CH<sub>3</sub>OH),  $[(2,2'$ -Bipyridine)(indazole)(2,2':6',2''-terpyridine)ruthenium(II)]bis(hexafluorophosphate),  $[\text{Ru}(\text{bipy})(\text{terpy})(\text{inda})](\text{PF}_6)_2$ , (**6**) and  $[(\text{Aqua})(2,2'$ -bipyridine)(2,2':6',2''-terpyridine)-ruthenium(II)]bis(hexafluorophosphate),  $[\text{Ru}(\text{bipy})(\text{terpy})\text{H}_2\text{O}](\text{PF}_6)_2$  (Ru-H<sub>2</sub>O).

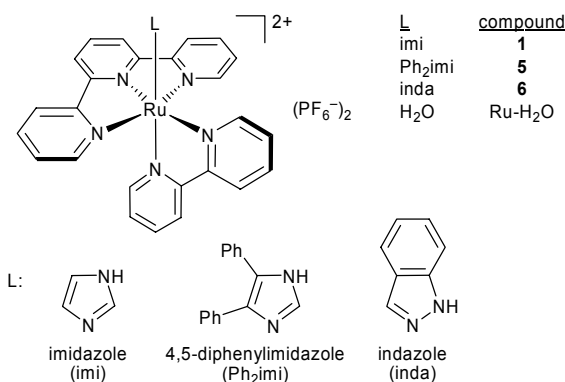

## Discussion

Despite the presence of ligand  $\pi$ -systems in the cations of compounds **1**, **5**, **6** and  $[\text{Ru}(\text{bipy})(\text{terpy})\text{H}_2\text{O}](\text{PF}_6)_2$  there are only few intermolecular C-H $\cdots\pi$ <sup>1</sup> or  $\pi$ - $\pi$  interactions<sup>2</sup> evident, due to the separating action of the PF<sub>6</sub><sup>-</sup> anions. These few non-covalent interactions are listed in Table 1. The listed  $\pi$ -stacking interactions can be viewed as medium to weak in that they exhibit rather long centroid-centroid distances (>4.0 Å) together with large slip angles ( $\beta, \gamma > 30^\circ$ ) and vertical displacements ( $a > 2.0$  Å) between the ring centroids. In comparison, strong  $\pi$ -stackings show rather short centroid-centroid contacts (<3.8 Å), small slip angles ( $\beta, \gamma < 25^\circ$ ) and vertical displacements (<1.5 Å) which translate into a sizable

overlap of the pyridyl-plane areas.<sup>1,3</sup> The intermolecular C-H $\cdots\pi$  contacts start around 2.7 Å for the (C)-H $\cdots$ ring centroid distances (Table 1). As such, these C-H $\cdots\pi$  contacts lie at the short end of the accepted distance range for this type of contact.<sup>1,4</sup> The cation of compound **5** also features intramolecular  $\pi$ - $\pi$  stacking between one of the phenyl groups of the imidazole ligand and the terpyridine ligand (see Fig. 3 in the publication). There is also substantial intramolecular  $\pi$ -overlap between this phenyl ring plane and the metal chelate ring built from Ru-N1-N2-C5-C6. It has been suggested that an active electron delocalization within the metal-N-heterocyclic chelate ring could exhibit some degree of "metalloaromaticity".<sup>5,6</sup> The possibility of the hydrophobic  $[\text{Ru}(\text{bipy})(\text{terpy})]^{2+}$ -fragment to enter into C-H $\cdots\pi$  or  $\pi$ -stacking interactions with the hydrophobic grooves of the protein may be an additional aspect of its protein binding.<sup>7</sup>

**Table 1** Distances (d/Å) and angles (°) for the  $\pi$ -contacts in the crystal structures <sup>a</sup>

| compound, $\pi$ - $\pi$ interactions<br>ring(I)··ring(J)                                                                         | d[Cg(I)··Cg(J)] <sup>b</sup> | $\alpha$ <sup>c</sup>        | $\beta$ <sup>d</sup>  | $\gamma$ <sup>e</sup>          | d[Cg(I)··P(J)] <sup>f</sup> | d[Cg(J)··P(I)] <sup>g</sup> | d[a] <sup>h</sup> |
|----------------------------------------------------------------------------------------------------------------------------------|------------------------------|------------------------------|-----------------------|--------------------------------|-----------------------------|-----------------------------|-------------------|
| 1, terpy-N2··terpy-N3 <sup>i</sup>                                                                                               | 4.38                         | 0.85                         | 36.5                  | 36.2                           | 3.53                        | 3.52                        | 2.60              |
| 5, intermolecular<br>bipy-N4··Ph-imi C29-34 <sup>ii</sup><br>intramolecular $\pi$ - $\pi$ interaction<br>Ph-imi C35-40··terpy-N1 | 4.16                         | 14.0                         | 32.3                  | 30.2                           | 3.60                        | 3.52                        | 2.22              |
| Ph-imi C35-40··<br>metallacycle Ru-N1-N2-C5-C6                                                                                   | 3.75                         | 6.4                          | 23.8                  | 26.1                           | 3.37                        | 3.43                        | 1.51              |
| Ph-imi C35-40··terpy-N2                                                                                                          | 3.66                         | 9.5                          | 31.0                  | 25.1                           | 3.32                        | 3.14                        | 1.89              |
|                                                                                                                                  | 4.18                         | 12.7                         | 45.3                  | 36.1                           | 3.38                        | 2.94                        | 2.97              |
| 6, bipy-N4··bipy-N4 <sup>iii</sup>                                                                                               | 3.83                         | 8.7                          | 15.4                  | 15.4                           | 3.69                        | 3.69                        | 1.02              |
| Ru-H <sub>2</sub> O, terpy-N1··terpy-N3 <sup>iv</sup>                                                                            | 4.03                         | 17.5                         | 23.3                  | 24.9                           | 3.66                        | 3.70                        | 1.60              |
| compound, CH- $\pi$ interactions<br>ligand-C-H··ring                                                                             | d[H··Cg] <sup>i</sup>        | d[H·· $\perp$ ] <sup>j</sup> | $\gamma$ <sup>e</sup> | $\angle$ [CH··Cg] <sup>k</sup> | d[C··Cg] <sup>l</sup>       |                             |                   |
| 1, terpy-C12-H··imi <sup>i</sup>                                                                                                 | 2.77                         | 2.73                         | 8.91                  | 148.2                          | 3.59                        |                             |                   |
| 5, terpy-C3-H··Ph-imi C29-34 <sup>v</sup><br>terpy-C14-H··bipy-N4 <sup>i</sup>                                                   | 2.74                         | 2.67                         | 12.6                  | 144.6                          | 3.54                        |                             |                   |
|                                                                                                                                  | 3.09                         | 2.95                         | 17.7                  | 155.1                          | 3.97                        |                             |                   |
| 6, terpy-C8-H··inda-C <sub>6</sub> <sup>vi</sup><br>inda-C <sub>6</sub> -C30-H··inda-5-ring <sup>vii</sup>                       | 2.90                         | 2.86                         | 10.3                  | 163.1                          | 3.81                        |                             |                   |
|                                                                                                                                  | 2.73                         | 2.68                         | 11.4                  | 160.2                          | 3.63                        |                             |                   |
| Ru-H <sub>2</sub> O, bipy-C17-H··bipy-N5 <sup>viii</sup>                                                                         | 3.24                         | 3.02                         | 21.3                  | 145.4                          | 4.04                        |                             |                   |

<sup>a</sup> For a graphical depiction of distances and angles in the assessment of the  $\pi$ -contacts, see Scheme 1. Pyridyl rings of the terpy or bipy ligands are named by their nitrogen atoms. – <sup>b</sup> Centroid-centroid distance. – <sup>c</sup> Dihedral angle between the ring planes. – <sup>d</sup> Angle between the centroid vector Cg(I)··Cg(J) and the normal to the plane I. – <sup>e</sup> Angle between the centroid vector Cg(I)··Cg(J) and the normal to the plane J. – <sup>f</sup> Perpendicular distance of Cg(I) on ring plane J. – <sup>g</sup> Perpendicular distance of Cg(J) on ring plane I. – <sup>h</sup> Vertical displacement between ring centroids. – <sup>i</sup> H-centroid distance. – <sup>j</sup> Perpendicular distance of H on ring plane. – <sup>k</sup> C-H-centroid angle. – <sup>l</sup> C-centroid distance. – Symmetry transformations: i = 1-x, 1-y, 1-z; ii = x, 1/2-y, -1/2+z; iii = -x, y, 1/2-z; iv = x, 3/2-y, -1/2+z; v = -x, 1/2+y, 1/2-z; vi = x, -1+y, z; vii = 1/2-x, 1/2+y, z; viii = x, 3/2-y, 1/2+z.

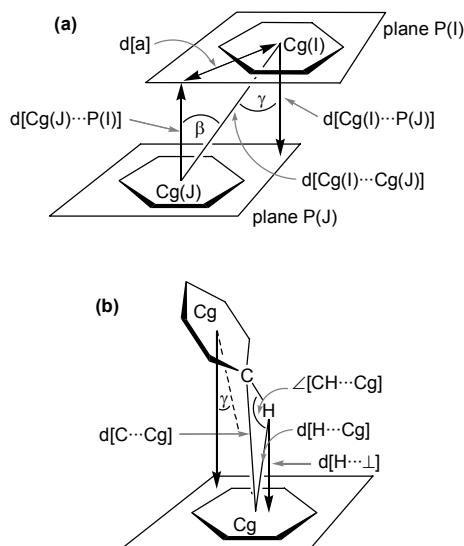
**Scheme 1** Graphical presentation of the parameters used in Table 1 for the description of (a)  $\pi$ - $\pi$  stacking and (b) CH- $\pi$  interactions.

## References

- M. Nishio, *CrystEngComm*, 2004, **6**, 130; M. Nishio, M. Hirota and Y. Umezawa, *The CH/ $\pi$  interaction* (Evidence, Nature and consequences), Wiley-VCH, 1998; Y. Umezawa, S. Tsuboyama, K. Honda, J. Uzawa and M. Nishio, *Bull. Chem. Soc. Jpn.*, 1998, **71**, 1207; C. Janiak, S. Temizdemir, S. Dechert, W. Deck, F. Girgsdies, J. Heinze, M. J. Kolm, T. G. Scharmann and O. M. Zipfel, *Eur. J. Inorg. Chem.*, 2000, 1229.
- C. Janiak, *J. Chem. Soc., Dalton Trans.*, 2000, 3885.
- $\pi$ -Interactions between pyridyl-type ligands for comparison: V. Lozan, P.-G. Lassahn, C. Zhang, B. Wu, C. Janiak, G. Rheinwald and H. Lang, *Z. Naturforsch. B*, 2003, **58**, 1152; C. Zhang and C. Janiak, *Z. Anorg. Allg. Chem.*, 2001, **627**, 1972; C. Zhang and C. Janiak, *J. Chem. Crystallogr.*, 2001, **31**, 29; H.-P. Wu, C. Janiak, G. Rheinwald and H. Lang, *J. Chem. Soc., Dalton Trans.*, 1999, 183; C. Janiak, L. Uehlin, H.-P. Wu, P. Klüfers, H. Piotrowski and T. G. Scharmann, *J. Chem. Soc., Dalton Trans.*, 1999, 3121; H.-P. Wu, C. Janiak, L. Uehlin, P. Klüfers and P. Mayer, *Chem. Commun.*, 1998, 2637.
- N. N. L. Madhavi, A. K. Katz, H. L. Carrell, A. Nangia and G. R. Desiraju, *Chem. Commun.*, 1997, 1953; H.-C. Weiss, D. Bläser, R. Boese, B. M. Doughan and M. M. Haley, *Chem. Commun.*, 1997, 1703; T. Steiner, M. Tamm, B. Lutz and J. van der Maas, *Chem. Commun.*, 1996, 1127; P. L. Anelli, P. R. Ashton, R. Ballardini, V. Balzani, M. Delgado, M. T. Gandolfi, T. T. Goodnow, A. E. Kaifer, D. Philp, M. Pietraszkiewicz, L. Prodi, M. V. Reddington, A. M. Z. Slawin, N. Spencer, J. F. Stoddart, C. Vicent and D. J. Williams, *J. Am. Chem. Soc.*, 1992, **114**, 193.
- H. Masui, *Coord. Chem. Rev.*, 2001, **219-221**, 957.
- For evidence of metalloaromaticity in aromatic  $\alpha,\alpha'$ -diimine-copper(II) chelates, see E. Craven, C. Zhang, C. Janiak, G. Rheinwald and H. Lang, *Z. Anorg. Allg. Chem.*, 2003, **629**, 2282; A. Castiñeiras, A. G. Sicilia-Zafra, J. M. González-Pérez, D. Choquesillo-Lazarte and J. Niclós-Gutiérrez, *Inorg. Chem.*, 2002, **41**, 6956.
- DNA binding of Ru complexes: J. A. Smith, J. G. Collins, B. T. Patterson and R. F. Keene, *Dalton Trans.*, 2004, 1277; P. U. Maheswari and M. Palaniandavar, *Inorg. Chim. Acta*, 2004, **357**, 901; C. Metcalfe and J. A. Thomas, *Chem. Sov. Rev.*, 2003, **32**, 215; P. P. Pelligrini and J. R. Aldrich-Wright, *Dalton Trans.*, 2003, 176.
